# Supplementary material for: Fucoidan enhances the anti-tumor effect of anti-PD-1 immunotherapy by regulating gut microbiota
Source: Royal Society of Chemistry journal article supplement (doi:10.1039/d3fo04807a), 2024-01-01
Supplement: d3fo04807a1.pdf [file d3fo04807a1.pdf]

## Fucoidan enhances the anti-tumor effect of anti-PD-1

### immunotherapy by regulating gut microbiota

Hui Li <sup>a†</sup>, Tieying Dong <sup>a†</sup>, Meng Tao <sup>a</sup>, Haifeng Zhao <sup>c</sup>, Tongtong Lan <sup>a</sup>, Shiyu Yan <sup>a</sup>, Xinyi Gong <sup>a</sup>,  
Qilong Hou <sup>a</sup>, Xuezhen Ma <sup>\*b</sup> and Yang Song <sup>\*a</sup>

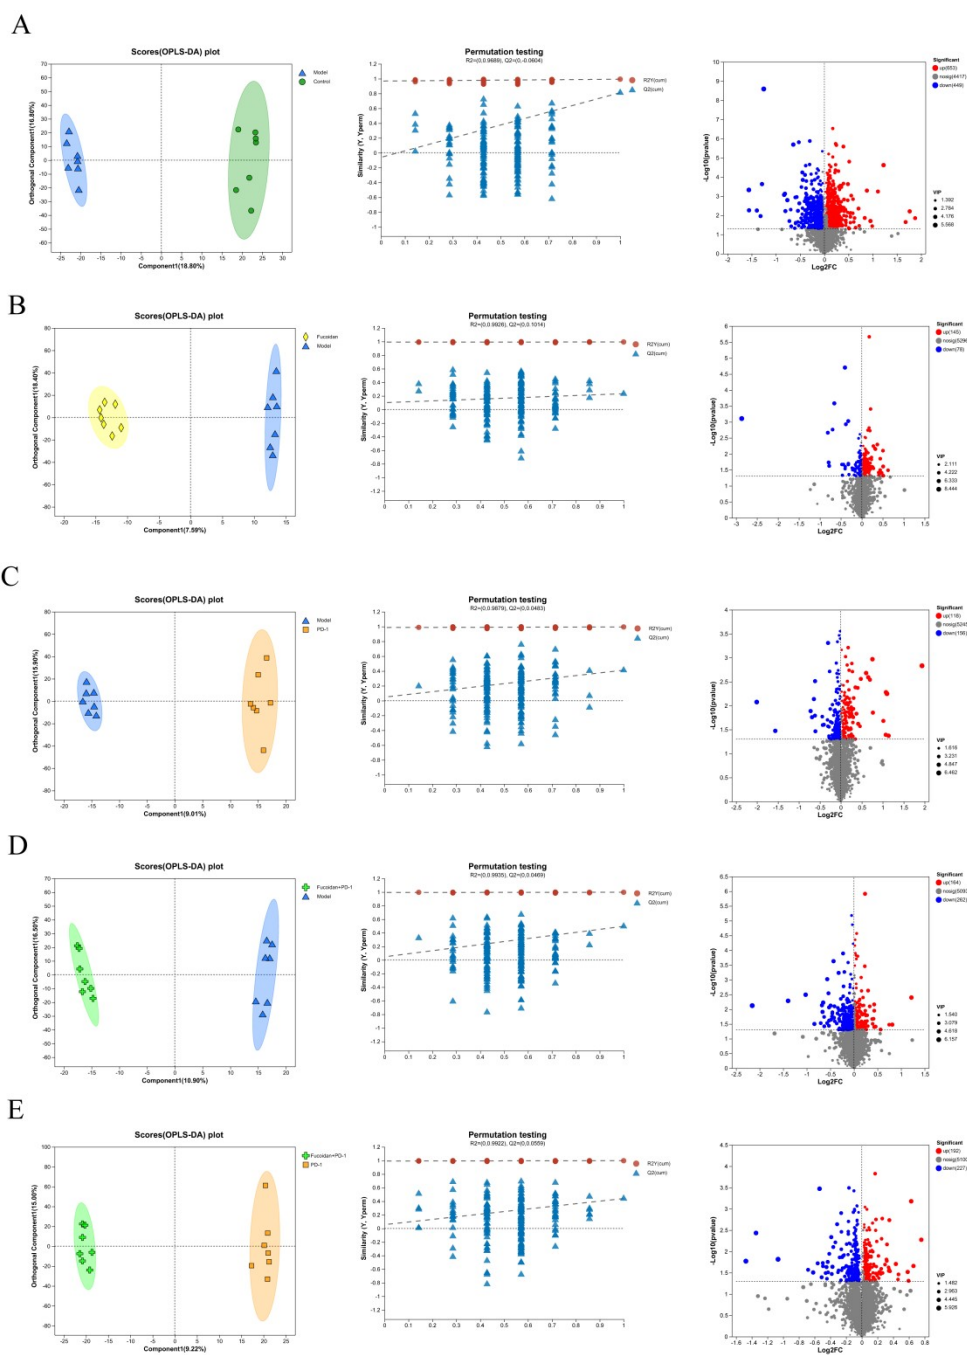

**Figure S1.** (A) OPLS-DA analysis of Control group and Model group ( $R^2X(\text{cum})=0.537$ ,  $R^2Y(\text{cum})=0.994$ ,  $Q^2(\text{cum})=0.812$ ); OPLS-DA replacement test of Control group and Model group; Volcanic map of

difference between Control group and Model group. (B) OPLS-DA analysis of Fucoidan group and Model group( $R^2X(\text{cum})=0.397$ ,  $R^2Y(\text{cum})=0.995$ ,  $Q^2(\text{cum})=0.233$ ); OPLS-DA replacement test of Fucoidan group and Model group; Volcanic map of difference between Fucoidan group and Model group. (C) OPLS-DA analysis of PD-1 group and Model group( $R^2X(\text{cum})=0.446$ ,  $R^2Y(\text{cum})=0.995$ ,  $Q^2(\text{cum})=0.411$ ); OPLS-DA replacement test of PD-1 group and Model group; Volcanic map of difference between PD-1 group and Model group. (D) OPLS-DA analysis of Fucoidan+PD-1 group and Model group( $R^2X(\text{cum})=0.377$ ,  $R^2Y(\text{cum})=0.997$ ,  $Q^2(\text{cum})=0.496$ ); OPLS-DA replacement test of Fucoidan+PD-1 group and Model group; Volcanic map of difference between Fucoidan+PD-1 group and Model group. (E) OPLS-DA analysis of Fucoidan+PD-1 group and PD-1 group( $R^2X(\text{cum})=0.322$ ,  $R^2Y(\text{cum})=0.995$ ,  $Q^2(\text{cum})=0.416$ ); OPLS-DA replacement test of Fucoidan+PD-1 group and PD-1 group; Volcanic map of difference between Fucoidan+PD-1 group and PD-1 group.  $R^2X(\text{cum})$  and  $R^2Y(\text{cum})$  represent cumulative interpretation rates;  $Q^2$  indicates the forecasting ability of the model. The closer the three indicators are to 1, the more stable and reliable the model is.  $Q^2 > 0.5$  indicates that the model has better forecasting ability, while  $Q^2 < 0.5$  indicates that the model has poor forecasting ability. Each dot in the diagram represents a specific metabolite, and the size of the dot represents the VIP value. The point on the left is the metabolite whose expression difference is down-regulated, and the point on the right is the metabolite whose expression difference is up-regulated. The more the point on the left and right and the point on the upper side, the more significant the expression difference is.
